# Supplementary material
Source: MDPI journal article supplement (https://www.mdpi.com/2304-6767/12/5/145)
Supplement: s1 [file s1]

**Table S1.** Included studies: summary of the results for the main outcomes of interest.

| Study                               | Group     | CAL         |                            |                             | PPD         |                             |                             | Radiographic bone levels           |           |                        | GR        |           |           |
|-------------------------------------|-----------|-------------|----------------------------|-----------------------------|-------------|-----------------------------|-----------------------------|------------------------------------|-----------|------------------------|-----------|-----------|-----------|
|                                     |           | Baseline    | 6 months                   | 12 months                   | Baseline    | 6 months                    | 12 months                   | Baseline                           | 6 months  | 12 months              | Baseline  | 6 months  | 12 months |
| Apatzidou et al. 2021 [55]          | Test A    | 7.3 ± 1.5   | 5.0 ± 1.8<br>(Δ 2.3 ± 1.2) | 4.6 ± 1.6 (Δ 2.8 ± 1.0)     | 6.7 ± 1.6   | 3.9 ± 1.5<br>(Δ 2.8 ± 0.8)  | 3.2 ± 1.2<br>(Δ 3.4 ± 1.1)  | BDD: 7.2 ± 2.8<br>BC-BD: 4.9 ± 2.2 | NA        | 5.1 ± 2.8<br>2.8 ± 2.2 | 0.7 ± 1.0 | 1.1 ± 1.6 | 1.3 ± 1.7 |
|                                     | Control B | 9.1 ± 2.7   | 6.5 ± 1.5<br>(Δ 2.6 ± 2.3) | 6.0 ± 1.0 (Δ 3.1 ± 2.4)     | 7.6 ± 2.42  | 4.5 ± 1.2<br>(Δ 3.1 ± 2.5)  | 3.4 ± 1.0<br>(Δ 3.5 ± 2.3)  | BDD: 8.2 ± 2.3<br>BC-BD: 4.3 ± 0.9 | NA        | 7.7 ± 2.2<br>2.8 ± 0.7 | 1.5 ± 1.3 | 2.0 ± 1.2 | 1.9 ± 1.4 |
|                                     | Control C | 8.9 ± 2.7   | 5.6 ± 1.7<br>(Δ 3.3 ± 1.5) | 5.8 ± 1.6 (Δ 3.1 ± 2.0)     | 7.5 ± 1.8   | 3.6 ± 1.1<br>(Δ 3.9 ± 1.0)  | 3.3 ± 1.2<br>(Δ 4.2 ± 1.9)  | BDD: 8.3 ± 2.9<br>BC-BD: 5.9 ± 2.8 | NA        | 6.8 ± 1.9<br>3.9 ± 1.9 | 1.4 ± 1.2 | 2.0 ± 0.8 | 2.5 ± 1.1 |
| Sanchez et al. 2020 [57]            | Test      | 10.6 ± 2.2  | NA                         | 9.44 ± 2.3 (Δ 1.44 ± 1.87)  | 6.6 ± 1.07  | NA                          | 4.3 ± 2.1<br>(Δ 2.3 ± 1.3)  | NA                                 | NA        | NA                     | 4.0 ± 1.7 | NA        | 5.3 ± 2.2 |
|                                     | Control   | 9.9 ± 1.6   | NA                         | 9.1 ± 2.1<br>(Δ 0.8 ± 1.68) | 6.8 ± 1.03  | NA                          | 4.7 ± 2.1<br>(Δ 2.1 ± 2.46) | NA                                 | NA        | NA                     | 3.2 ± 1.8 | NA        | 4.4 ± 1.3 |
| Abdal-Wahab et al. 2020 [54]        | Test      | 6.3 ± 2.06  | 2.3 ± 1.16                 | NA                          | 7.5 ± 2.42  | 3.10 ± 0.88                 | NA                          | NA                                 | NA        | NA                     | NA        | NA        | NA        |
|                                     | Control   | 5.3 ± 0.95  | 4.20 ± 1.0                 | NA                          | 6.5 ± 0.52  | 5.20 ± 0.80                 | NA                          | NA                                 | NA        | NA                     | NA        | NA        | NA        |
| Hernández-Monjaraz et al. 2020 [52] | Test      | NA          | NA                         | NA                          | 5.66 ± 0.41 | 2.34 ± 0.29 (Δ 3.32 ± 0.12) | NA                          | NA                                 | NA        | NA                     | NA        | NA        | NA        |
|                                     | Control   | NA          | NA                         | NA                          | 5.58 ± 0.38 | 3.78 ± 0.53 (Δ 1.80 ± 0.15) | NA                          | NA                                 | NA        | NA                     | NA        | NA        | NA        |
| Ferrarotti et al. 2018 [56]         | Test      | 10.0 ± 1.6  | 5.4 ± 1.2<br>(Δ 4.6 ± 1.4) | 5.5 ± 1.1<br>(4.5 ± 1.9)    | 8.3 ± 1.2   | 3.5 ± 0.8<br>(Δ 4.8 ± 0.9)  | 3.4 ± 0.9<br>(Δ 4.9 ± 1.4)  | BC-BD: 6.4 ± 1.4                   | 2.7 ± 0.8 | 2.5 ± 0.7              | 1.7 ± 1.2 | 1.9 ± 1.2 | 2.1 ± 1.3 |
|                                     | Control   | 9.4 ± 1.5   | 6.6 ± 1.3<br>(Δ 2.8 ± 1.7) | 6.5 ± 1.2<br>(Δ 2.9 ± 2.2)  | 7.9 ± 1.3   | 4.6 ± 1.0<br>(Δ 3.3 ± 1.6)  | 4.5 ± 1.0<br>(Δ 3.4 ± 1.7)  | BC-BD: 5.6 ± 1.0                   | 4.1 ± 0.9 | 4.1 ± 0.9              | 1.5 ± 0.8 | 2.0 ± 1.1 | 2.0 ± 1.2 |
| Shalini & Vandana 2018 [53]         | Test      | 6.35 ± 1.15 | NA                         | NA                          | 8.28 ± 1.26 | NA                          | NA                          | NA                                 | NA        | NA                     | NA        | NA        | NA        |

|                          |         |             |    |    |             |    |    |                  |             |             |    |    |    |
|--------------------------|---------|-------------|----|----|-------------|----|----|------------------|-------------|-------------|----|----|----|
|                          | Group   | 6.92 ± 2.55 | NA | NA | 8.21 ± 3.06 | NA | NA | NA               | NA          | NA          | NA | NA | NA |
| Chen et al.<br>2016 [19] | Test    | NA          | NA | NA | NA          | NA | NA | BDD: 7.20 ± 2.65 | 4.61 ± 1.87 | 4.49 ± 2.03 | NA | NA | NA |
|                          | Control | NA          | NA | NA | NA          | NA | NA | BDD: 7.19 ± 1.87 | 5.11 ± 1.53 | 4.80 ± 1.41 | NA | NA | NA |

**Legend:** CAL: clinical attachment level; PPD: probing pocket depth; BDD: linear distance from cementoenamel junction to bottom of defect; BC-BD: linear distance from bone crest to bottom of defect.
